# Supplementary material
Source: MDPI journal article supplement (https://www.mdpi.com/1996-1073/14/2/355)
Supplement: s1 [file s1]

## Supplementary Materials

## Supplement to 3.1. Catalyst performance

WGS rate equation acc. to Choi et al. with reaction rate  $r_{\text{CO}}$  in mol/(g·h), temperature  $T$  in K, pressure  $p$  in atm, and equilibrium constant  $K_{\text{eq}}$  calculated from Eq. (2).

$$r_{\text{CO}} = 2.96 \cdot 10^5 \cdot \exp\left(-\frac{47400}{R \cdot T}\right) \cdot \left(p_{\text{H}_2\text{O}} \cdot p_{\text{CO}} - \frac{p_{\text{CO}_2} \cdot p_{\text{H}_2}}{K_{\text{eq}}}\right) \quad (\text{S1})$$

Supplement to 3.2. Structural properties and CO<sub>2</sub> capture performance of sorbent

Table S1. BET surface area, BJH average pore width and cumulative pore volume.

| Sample         | surface area / m <sup>2</sup> /g | pore width / nm | pore volume / cm <sup>3</sup> /g |
|----------------|----------------------------------|-----------------|----------------------------------|
| MG70-400       | 170                              | 3.95            | 0.123                            |
| MG70-K-400     | 9                                | 12.5            | 0.027                            |
| MG70-400-K-400 | 18                               | 9.50            | 0.042                            |

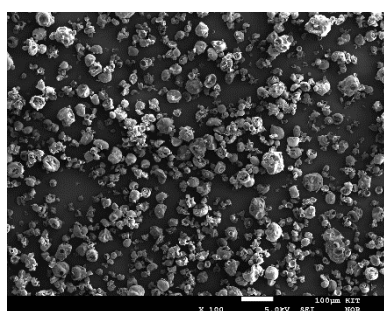

(a)

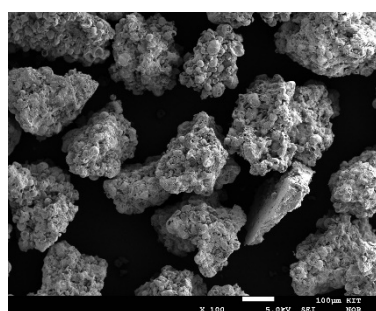

(b)

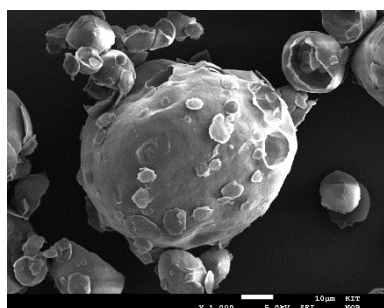

(c)

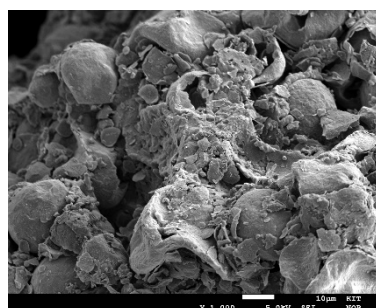

(d)

**Figure S1.** SE image of (a) untreated sample (MG70) (x100), (b) impregnated – calcined sample (MG70-K-400) (x100), (c) untreated sample (MG70) (x1000), and (d) impregnated – calcined sample (MG70-K-400) (x1000).

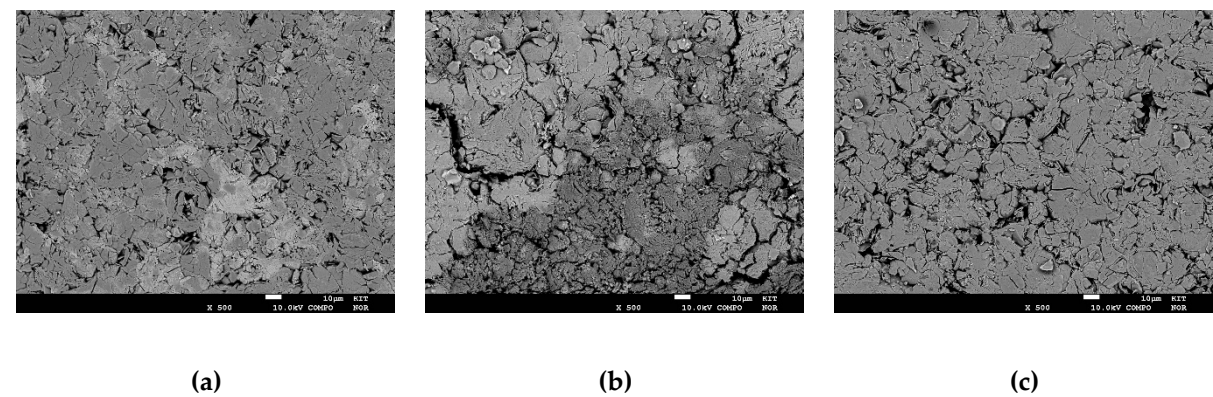

**Figure S2.** BSE image (x500) of pressed powder (a) calcined – impregnated sample (MG70-400-K), (b) impregnated – calcined sample (MG70-K-400), and (c) calcined – impregnated – calcined sample (MG70-400-K-400).

**Table S2.** EDS results: Mg/Al ratio (average) and potassium content (probe positions in Figure S3).

| Sample         | Mg/Al / -   | K 1 / wt% | K 2 / wt% | K 3 / wt% | K 4 / wt% |
|----------------|-------------|-----------|-----------|-----------|-----------|
| MG70           | 3.11 ± 0.03 | -         | -         | -         |           |
| MG70-400       | 3.18 ± 0.02 | -         | -         | -         |           |
| MG70-K-400     | 3.64 ± 0.54 | 6.55      | 2.95      | 23.97     | 23.14     |
| MG70-400-K     | 3.19 ± 0.06 | 12.85     | 6.52      | 26.53     |           |
| MG70-400-K-400 | 3.12 ± 0.02 | 6.89      | 3.19      | 6.55      |           |

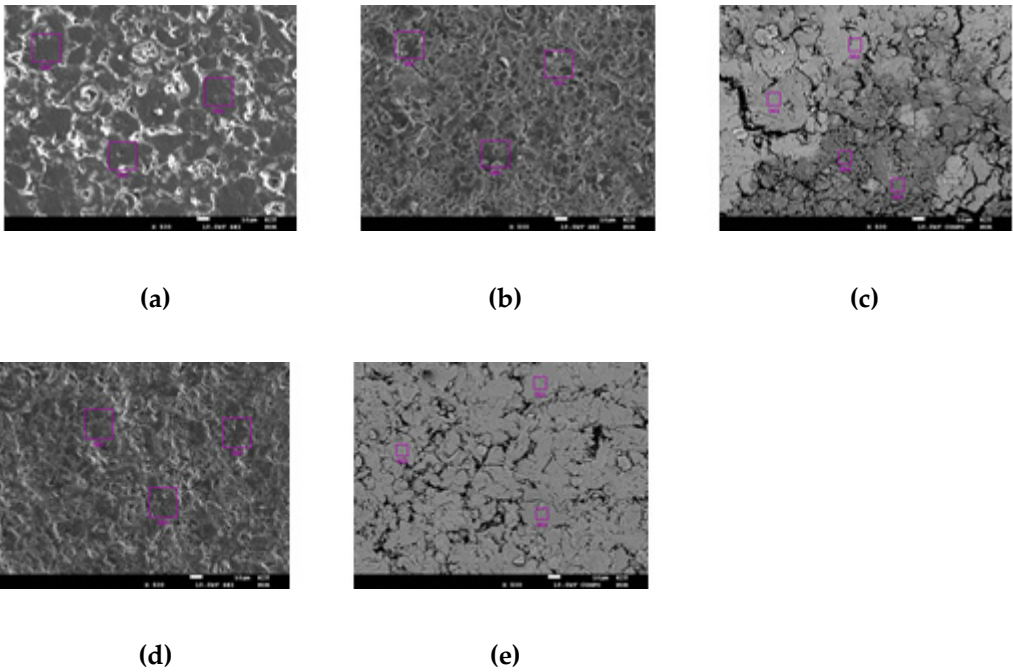

**Figure S3.** Probe positions marked for EDS analysis of pressed powder (a) untreated sample (MG70), (b) calcined sample (MG70-400), (c) impregnated – calcined sample (MG70-K-400), (d) calcined – impregnated sample (MG70-400-K), and (e) calcined – impregnated – calcined sample (MG70-400-K-400). Results are listed in Table S2.

**Table S3.** Freundlich equation (Eq. (S2)) parameters  $k_F$  and  $n$ , and fitting parameter  $R^2$ .

| Sample         | $k_F$ / mmol/(g·bar <sup>1/n</sup> ) | $n$ / - | $R^2$ / - |
|----------------|--------------------------------------|---------|-----------|
| MG70-250       | 0.008                                | 4.687   | 0.966     |
| MG70-400       | 0.071                                | 5.280   | 0.984     |
| MG70-500       | 0.022                                | 4.399   | 0.985     |
| MG70-K-400     | 0.174                                | 9.512   | 0.97      |
| MG70-400-K-400 | 0.141                                | 8.924   | 0.967     |

Freundlich model equation for CO<sub>2</sub> adsorption isotherm with  $n_{ads}$  being the specific amount of moles CO<sub>2</sub> adsorbed in mmol/g, Freundlich constant  $k_F$  in mmol/(g·bar<sup>1/n</sup>), partial pressure of CO<sub>2</sub>  $p_{CO_2}$  in bar, and adsorption intensity  $n$ .

$$n_{ads} = k_F \cdot p_{CO_2}^{1/n} \quad (S2)$$

### Supplement to 3.3 SEWGS performance

#### Supplement to 3.3.2 Long term stability

The sorbent in Figure S4 has seen a higher water content (in other experiments at different conditions) between the reproduced experiments (II and III), what resumed in an increase in both, breakthrough time and sorption capacity. This might be due to adsorption site activation caused by steam, see section 3.3.3 and 3.3.4. However, the sorbent in the example depicted in Figure S5 had a comparable time on stream but was not exposed to different conditions between the repetitions, and no noteworthy difference in breakthrough delay or in adsorbed CO<sub>2</sub> could be detected.

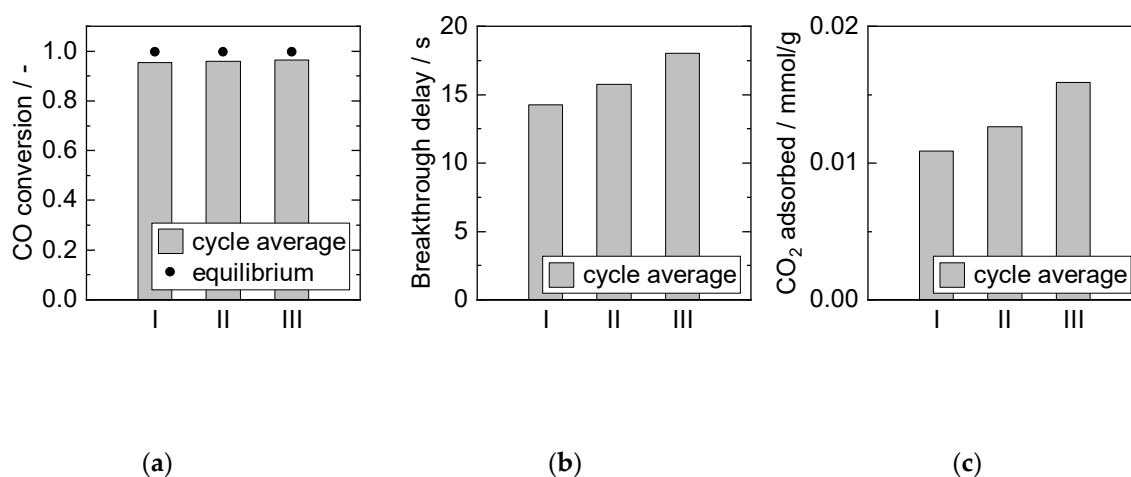

**Figure S4.** Adsorption cycle average (a) CO conversion, (b) breakthrough delay, and (c) adsorbed amount of CO<sub>2</sub> for reproduced experiments after different sorbent “histories”. Adsorption: 15 min, 8 bar, 2000 ml/min, 2.5 % CO, S/G = 4. Desorption: 40 min, 1 bar, 1000 ml/min, 40 % H<sub>2</sub>O. PBMR, Mode B, 250 °C.

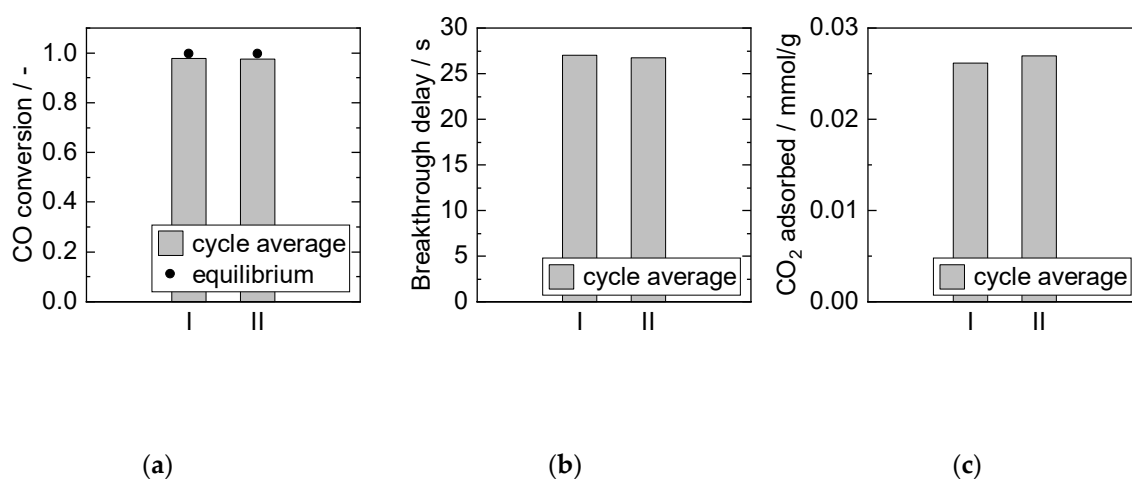

**Figure S5.** Adsorption cycle average (a) CO conversion, (b) breakthrough delay, and (c) adsorbed amount of CO<sub>2</sub> for reproduced experiments after comparable sorbent “histories”. Adsorption: 15 min, 8 bar, 2000 ml/min, 2.5 % CO, S/G = 4. Desorption: 40 min, 1 bar, 1000 ml/min, 40 % H<sub>2</sub>O. PBMR, Mode C, 250 °C.

#### Supplement to 3.3.3 Variation of adsorption parameters

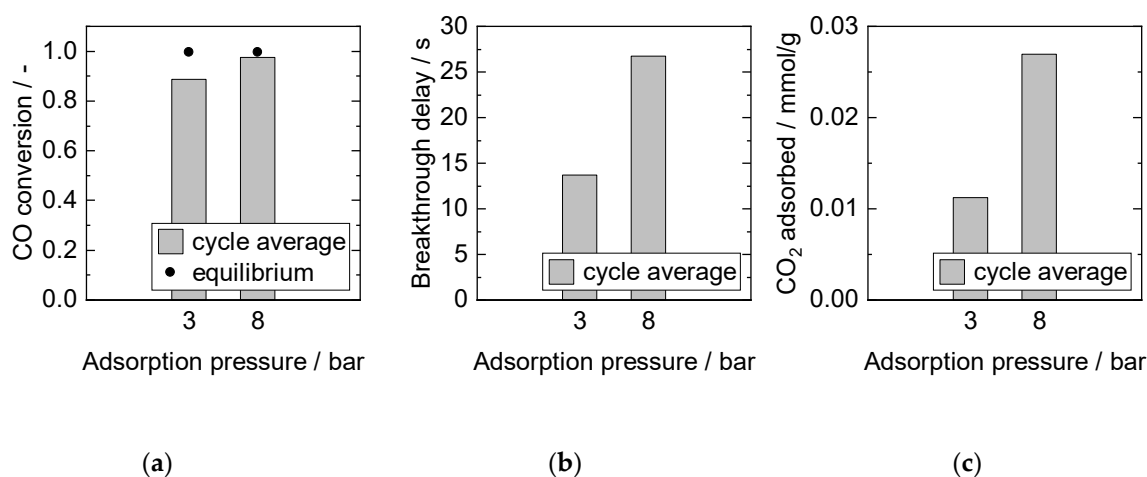

**Figure S6.** Adsorption cycle average (a) CO conversion, (b) breakthrough delay, and (c) adsorbed amount of CO<sub>2</sub>. Adsorption: 15 min, 2000 ml/min, 2.5 % CO, S/G = 4. Desorption: 40 min, 1 bar, 1000 ml/min, 40 % H<sub>2</sub>O. PBMR, Mode C, 250 °C.

#### Supplement to 3.3.5 Variation of reactor configuration

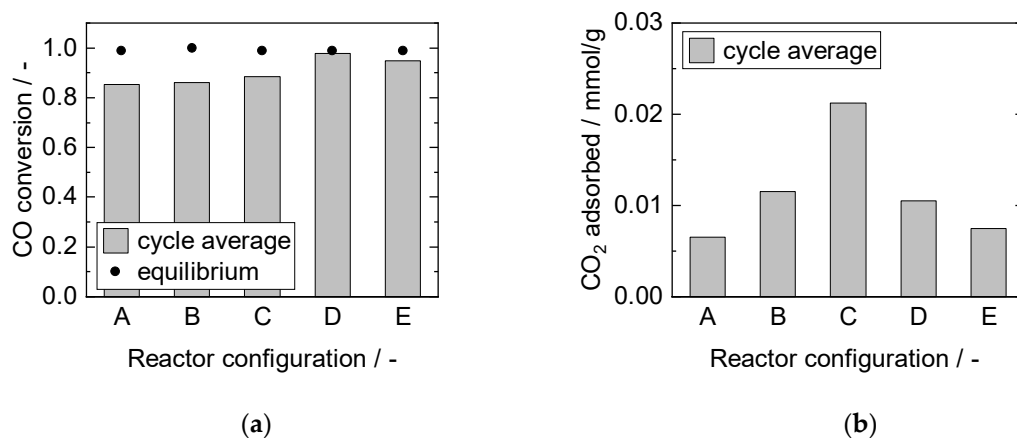

**Figure S7.** Adsorption cycle average (a) CO conversion, and (b) adsorbed amount of CO<sub>2</sub>. Adsorption: 15 min, 8 bar, 2000 ml/min, 10 % CO, S/G = 2. Desorption: 40 min, 1 bar, 1000 ml/min, 40 % H<sub>2</sub>O. PBMR, 250 °C.

54

55

56

57
